# Supplementary material for: Deciphering the Nature of Trp73 Isoforms in Mouse Embryonic Stem Cell Models: Generation of Isoform-Specific Deficient Cell Lines Using the CRISPR/Cas9 Gene Editing System
Source: MDPI journal article supplement (doi:10.3390/cancers13133182), 2021-06-25
Supplement: s1 [file s1]

Article

# Deciphering the Nature of *Trp73* Isoforms in Mouse Embryonic Stem Cell Models: Generation of Isoform-Specific Deficient Cell Lines Using the CRISPR/Cas9 Gene Editing System

Lorena López-Ferreras, Nicole Martínez-García, Laura Maeso-Alonso, Marta Martín-López, Ángela Díez-Matilla, Javier Villoch-Fernandez, Hugo Alonso-Olivares, Margarita M. Marques and Maria C. Marin

## Supplementary Materials:

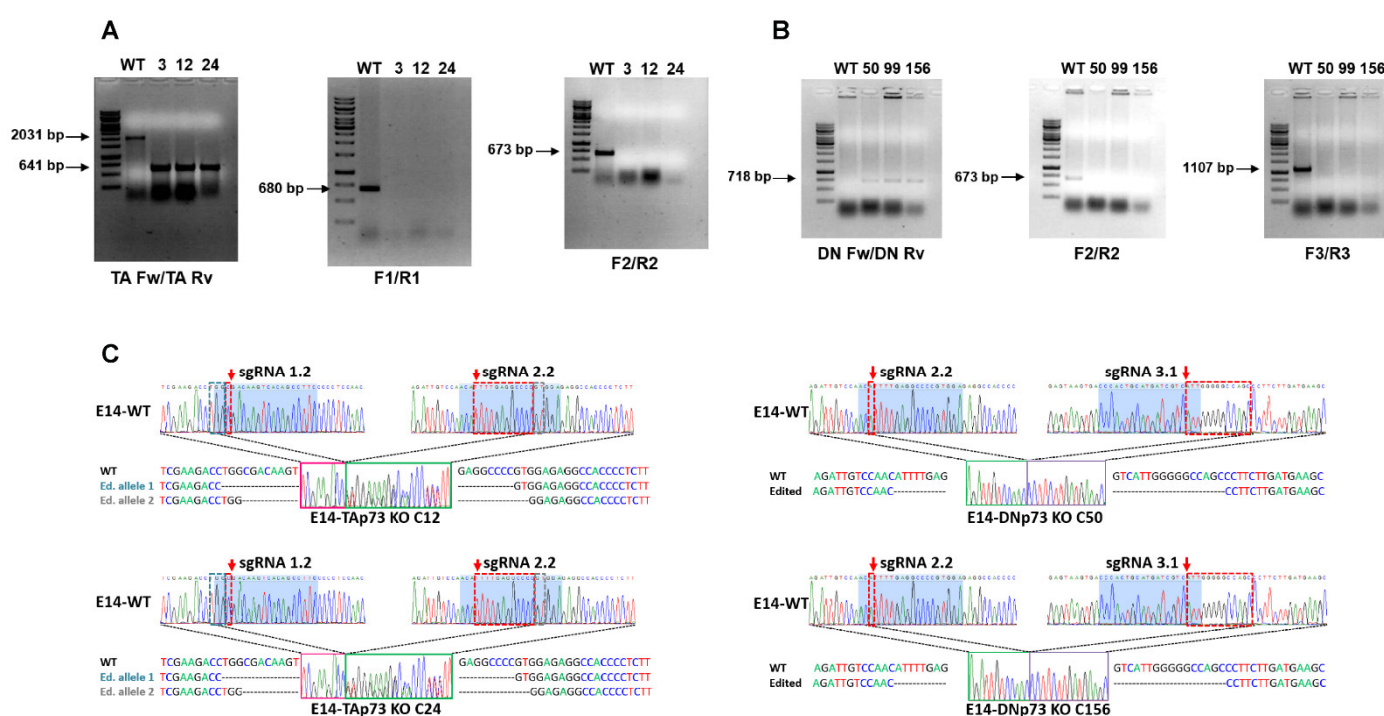

**Figure S1.** Confirmation of the correct gene editing of the E14-TA- and E14-DN-p73KO clones. (A,B) All E14-TA- (A) and E14-DN- (B) p73KO clones showed the expected PCR fragments (Primers Fw/Rv), while no amplicons, for amplification across the boundaries of the sgRNA binding regions (Primers F1/R1, F2/R2 and F3/R3), were detected. (C) Sequencing electropherograms from E14-WT cells and the selected clones. All the E14-TAp73KO clone show a 1390 bp deletion plus small different indels between both alleles in the boundaries of the deletion; while the E14-DNp73KO clones have a 7890 bp deletion (including a 14 bp indel, red dotted-squares), homozygous for both alleles. Blue-shadowed sequence corresponds to sgRNA target sequence.

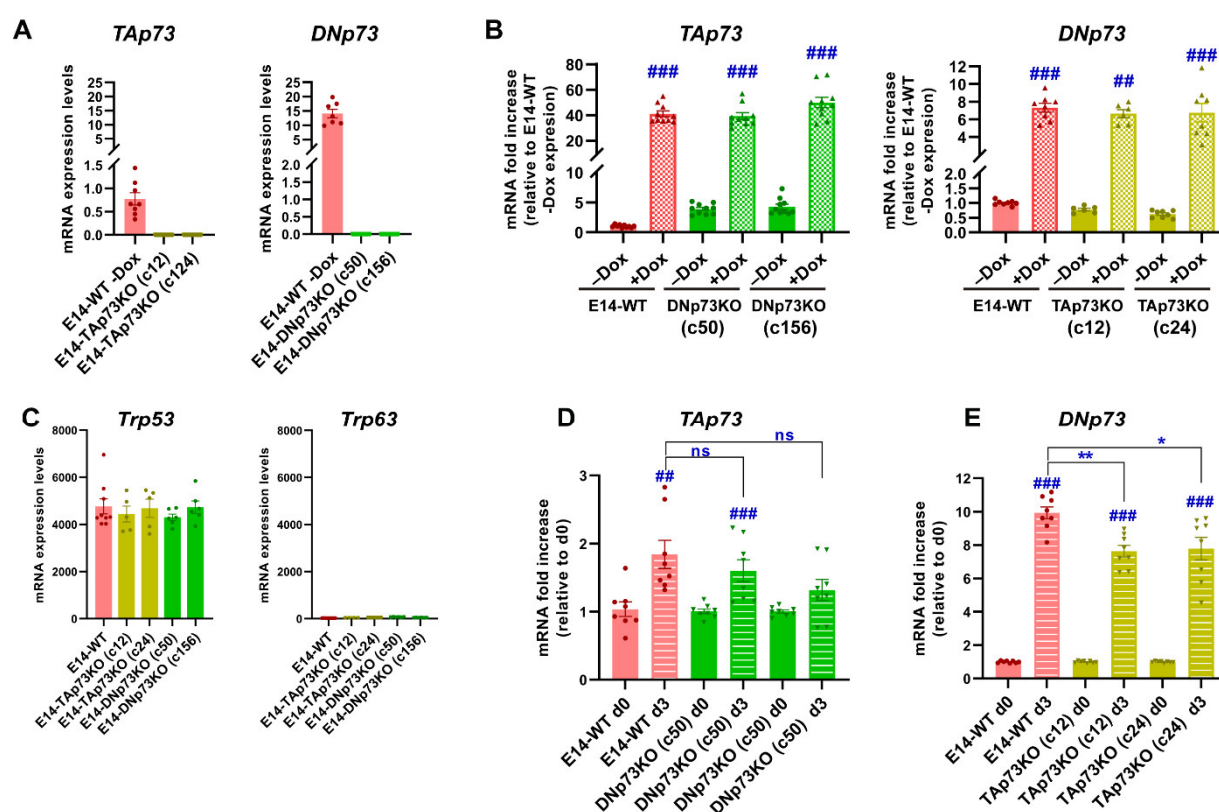

**Figure S2.** Expression levels of the p53 family members by qRT-PCR analysis. (A) Expression of the specific p73KO isoform under basal conditions. (B) TA- and DN-p73 expression upon treatment with doxorubicin (Dox). (C) Expression of *Trp53* and *Trp63*. (D,E) Expression of p73-isoforms under differentiation-permissive conditions (after 3 days of EBs culture, d3) compared to stemness basal conditions (d0, S/L) for DNp73KO (D) and TAp73KO (E) cells. The data represents the mean  $\pm$  SEM of three independent experiments. \* p-value < 0.05, \*\* p-value < 0.01, \*\*\* p-value < 0.0001, ### p-value < 0.001.

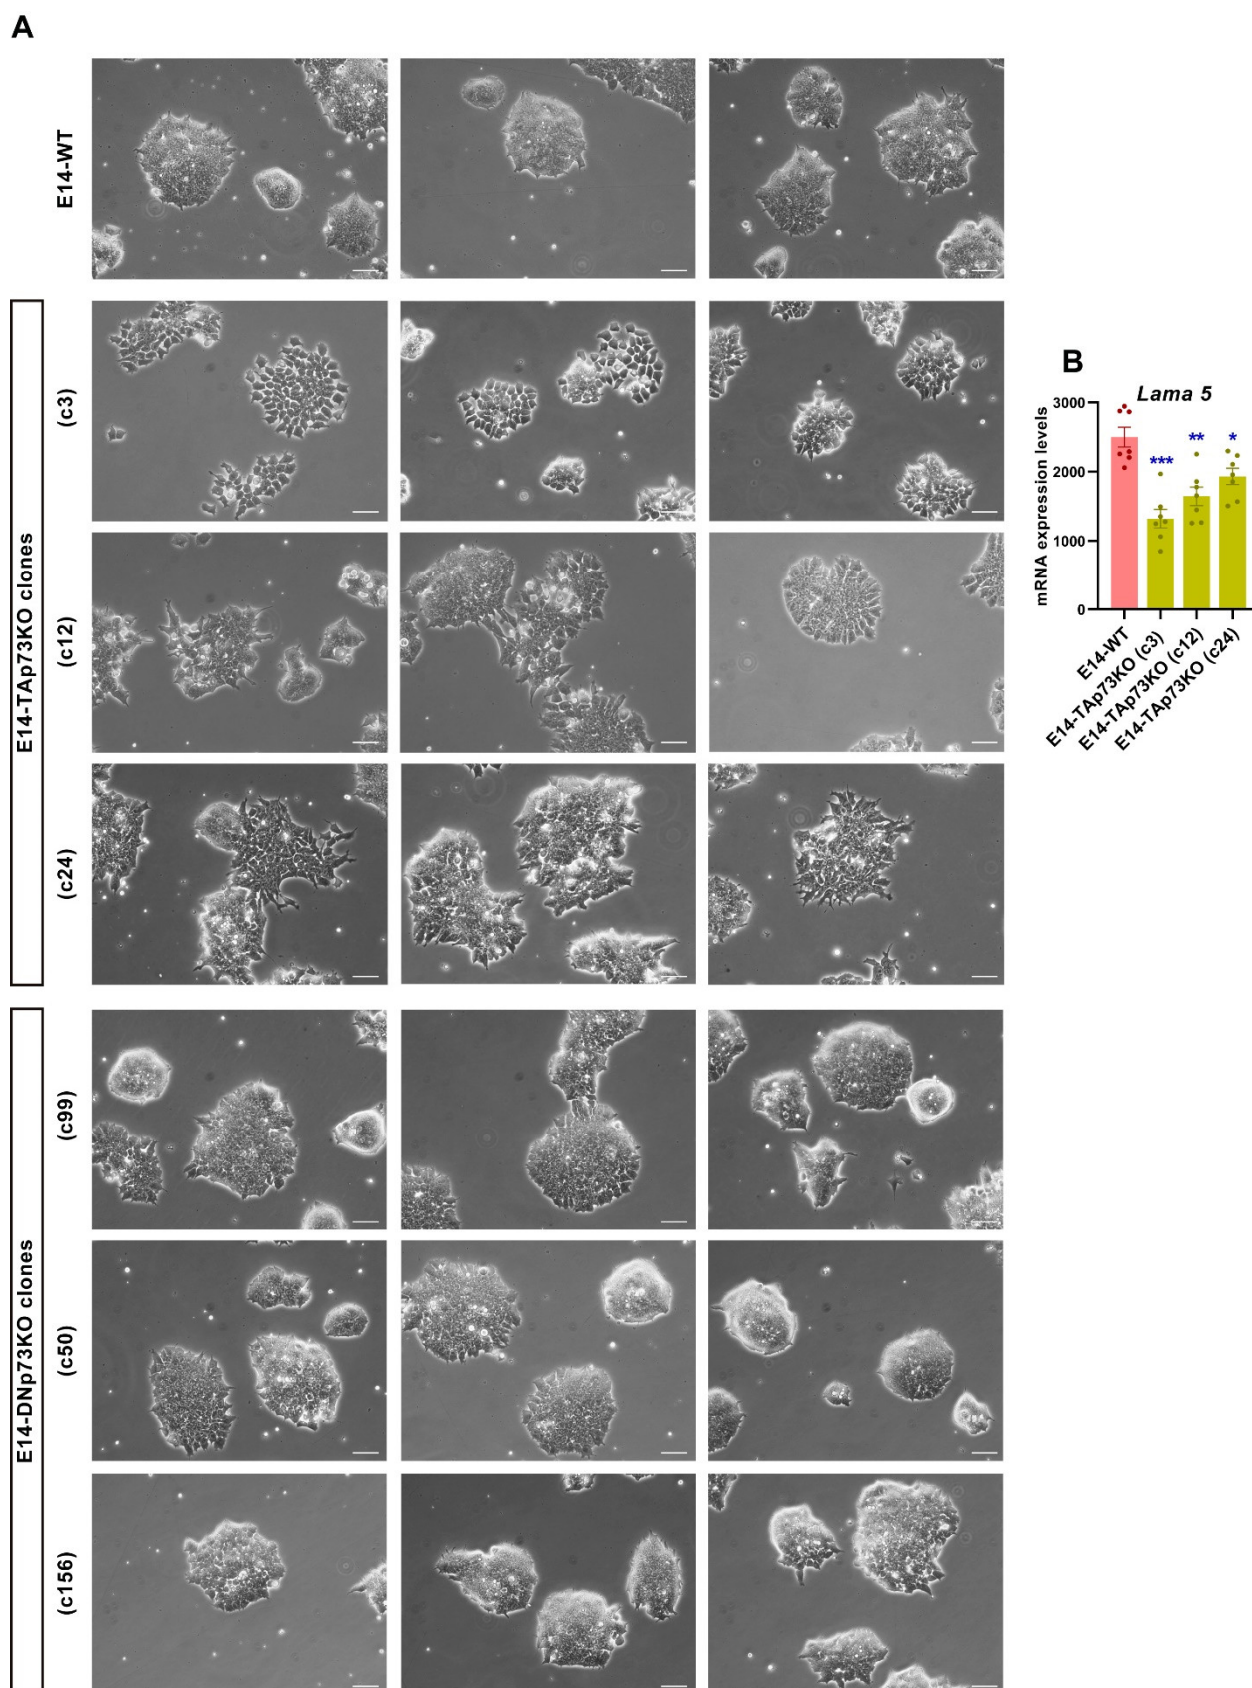

**Figure S3.** mESC characteristic colony phenotype is lost in E14-TAp73KO cells. **(A)** Representative images of the selected clones seeded at colony-forming density (2,500 cell/cm<sup>2</sup>) under proliferating culture conditions (S/L). Scale bar: 75  $\mu$ m. **(B)** Lama5 expression, analyzed by qRT-PCR, is lower in all the E14-TAp73KO clones compared to E14-WT cells. \* p-value < 0.05, \*\* p-value < 0.01, \*\*\* p-value < 0.001.



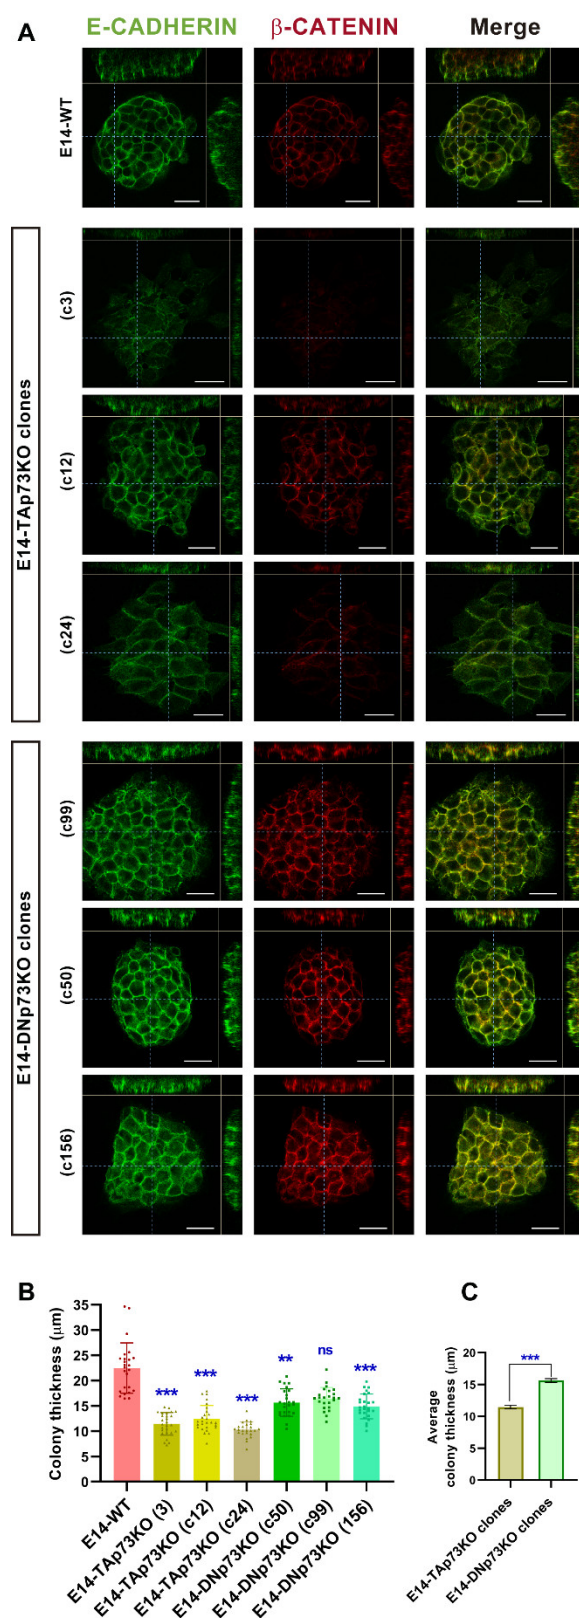

**Figure S4.** p73 deletion affects colony thickness. **(A)** Representative images of colonies of the different selected clones. Cells were immunostained with anti-E-cadherin (red) and anti- $\beta$ -catenin (green) antibodies. Scale bar: 20  $\mu$ m. **(B)** Quantification of the colony thickness compared to e14-WT cells by the orthogonal analysis of the figures. The data represents the mean  $\pm$  SEM of at least the analysis of 10 independent colonies. **(C)** Comparison of the colony average thickness between E14-TA and E14-DN-p73Ko cells. \*\* p-value < 0.01, \*\*\* p-value < 0.001.

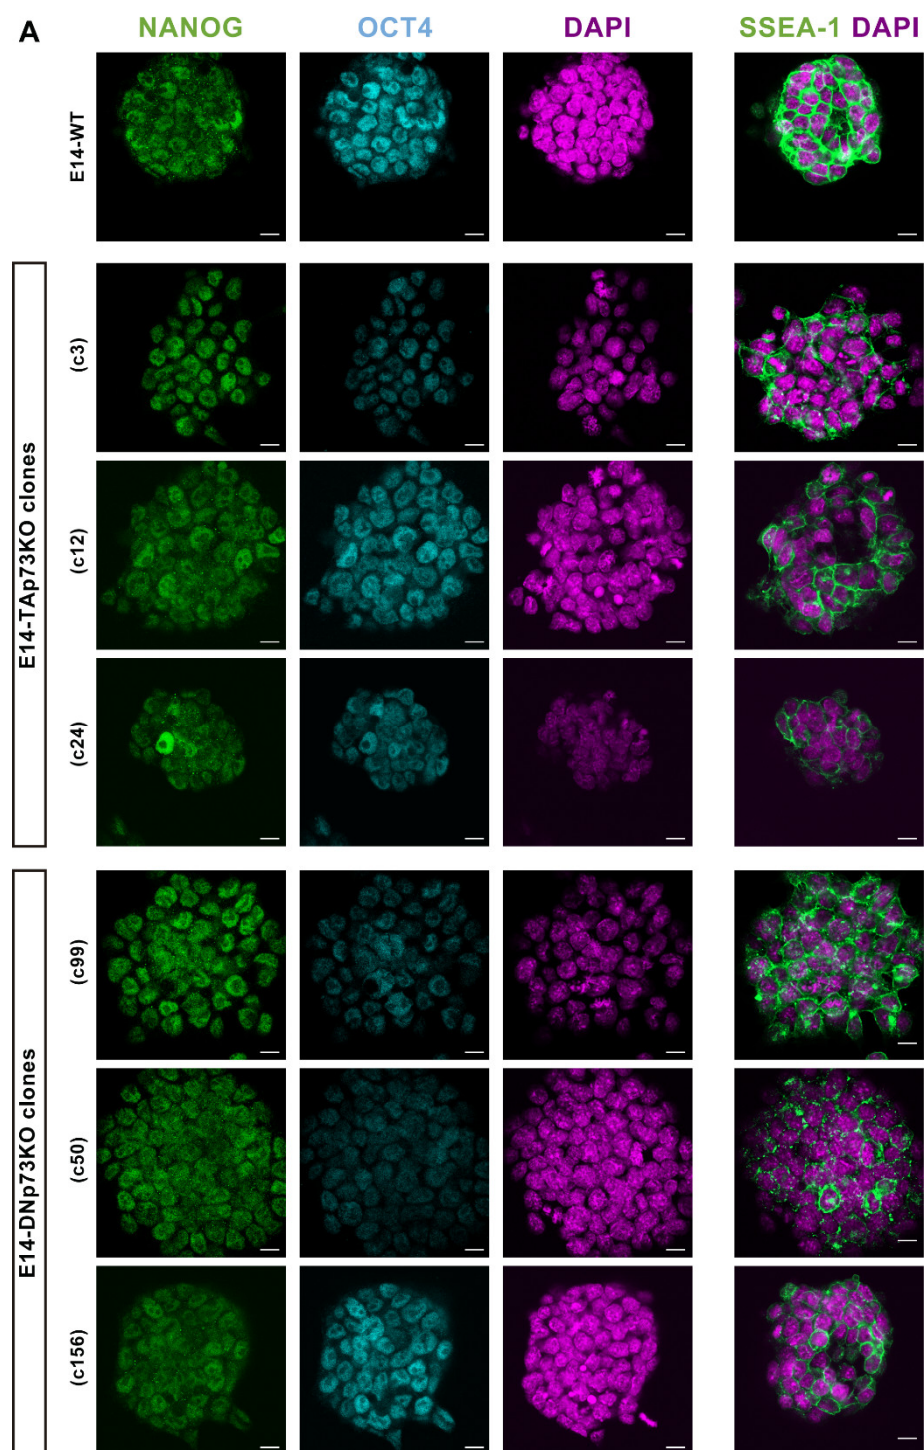

**Figure S5.** Expression of pluripotency markers. (A) Confocal microscopy analysis of pluripotency markers NANOG (green), OCT4 (blue) and SSEA-1 (green) in E14-TA- and E14-DN- p73KO clones. DAPI (purple) was used to visualize nuclei. Scale bars: 20  $\mu$ m.

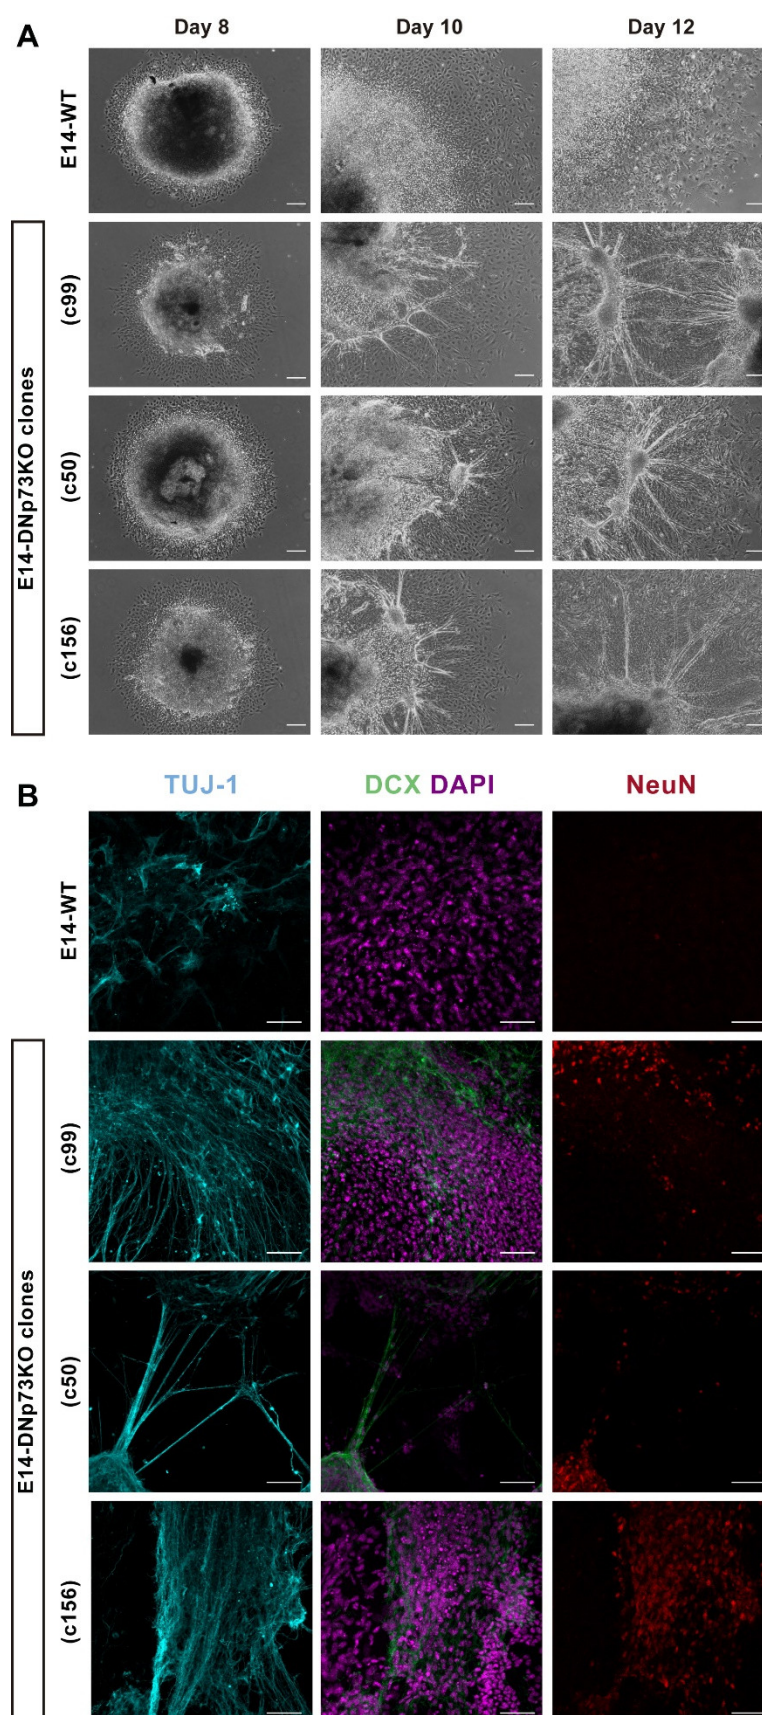

**Figure S6.** Neural premature differentiation is present in all E14-DNp73KO clones. **(A)** Representative phase-contrast microscopy images of embryonic bodies at different timepoints. **(B)** Confocal microscopy images showing markers of neural differentiation: TUJ-1 (blue), Double-cortin (DCX, green) and NeuN (red) after 14 days of differentiation. Nuclei were stained with DAPI (purple).
